# Supplementary material for: In vivo chromatic and spatial tuning of foveolar retinal ganglion cells in Macaca fascicularis
Source: PubMed Central journal article supplement (PMC9707781; doi:10.1371/journal.pone.0278261), 2022-11-29

single-cone RF  
center model scenario

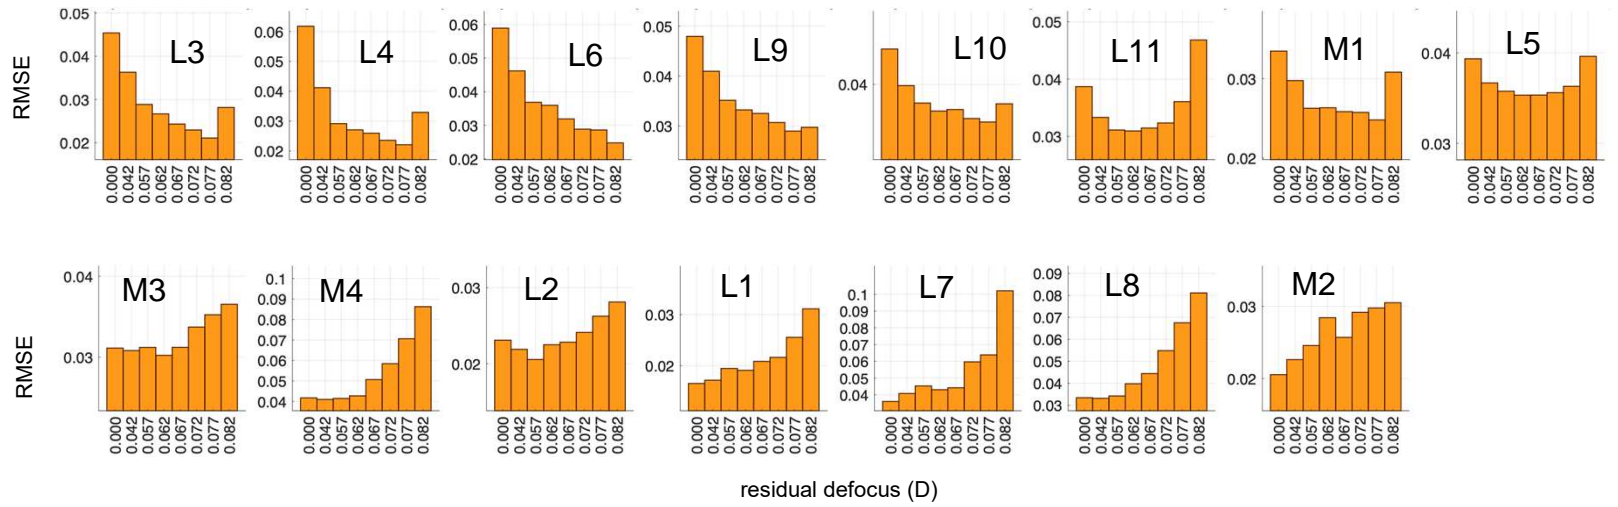

multi-cone RF  
center model scenario

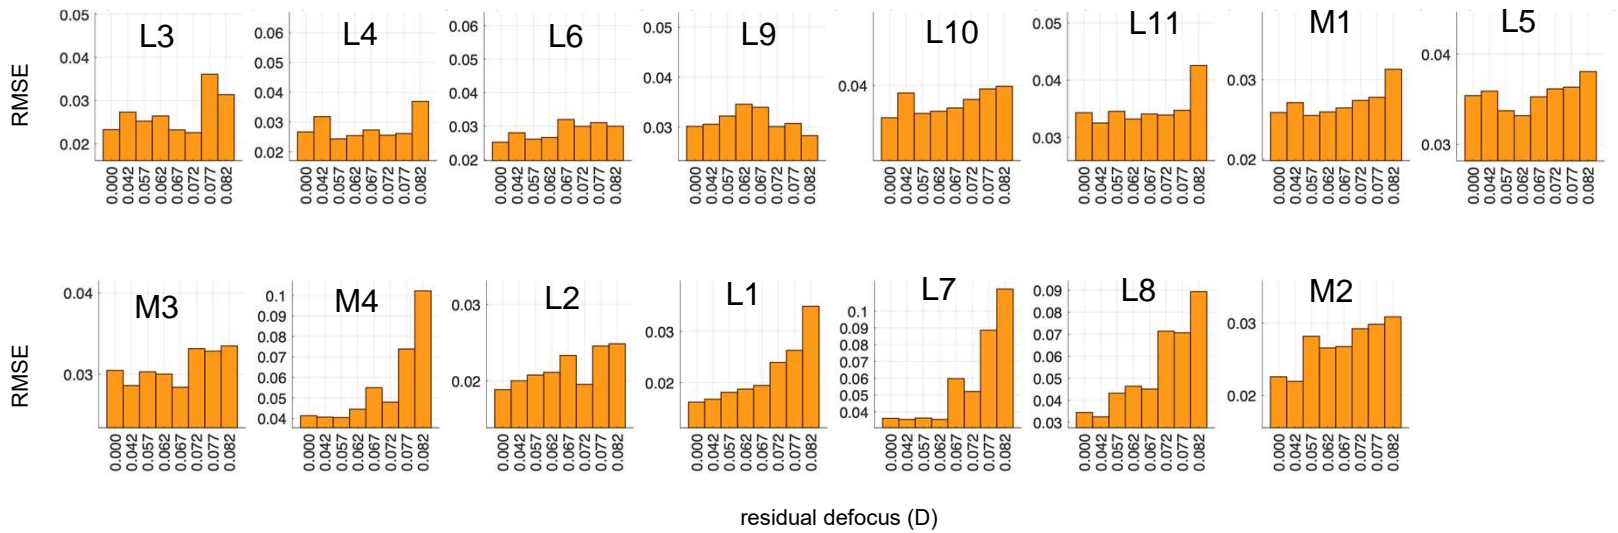

Supplement: pone.0278261.s009.pdf [file pone.0278261.s009.pdf]
