# Supplementary material for: In vivo chromatic and spatial tuning of foveolar retinal ganglion cells in Macaca fascicularis
Source: PubMed Central journal article supplement (PMC9707781; doi:10.1371/journal.pone.0278261), 2022-11-29

# single-cone center, 0.00D residual defocus

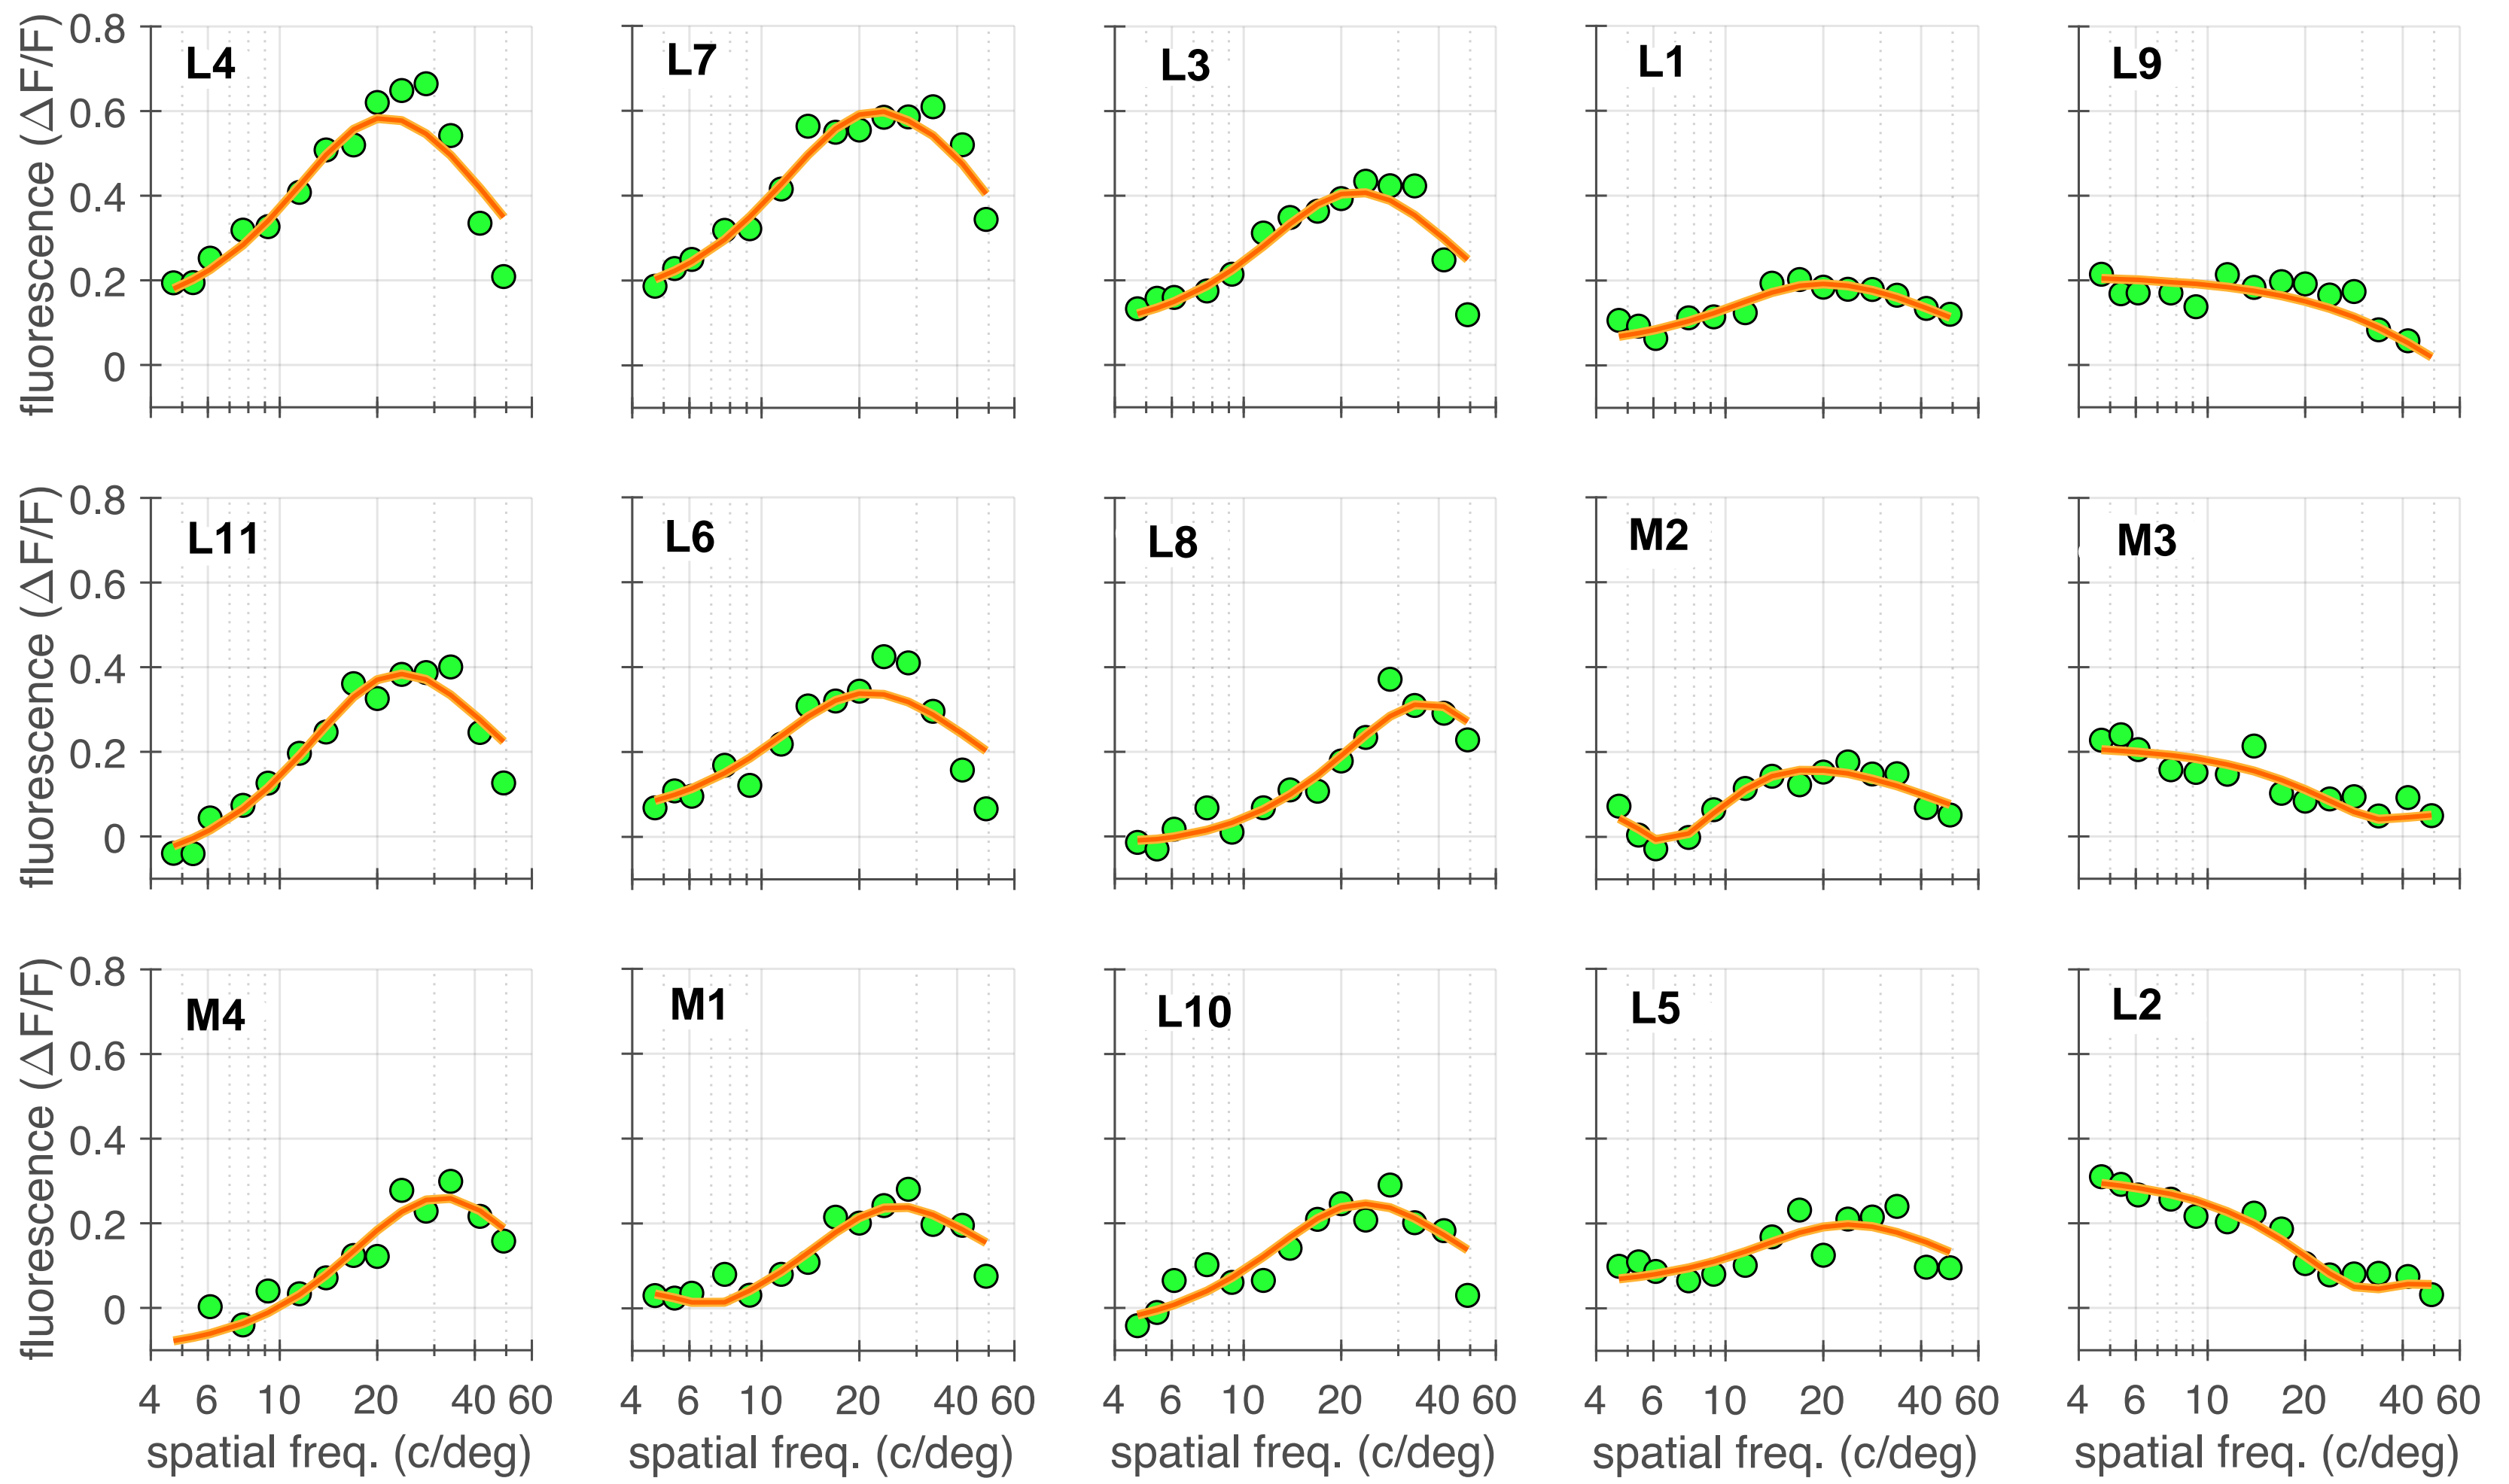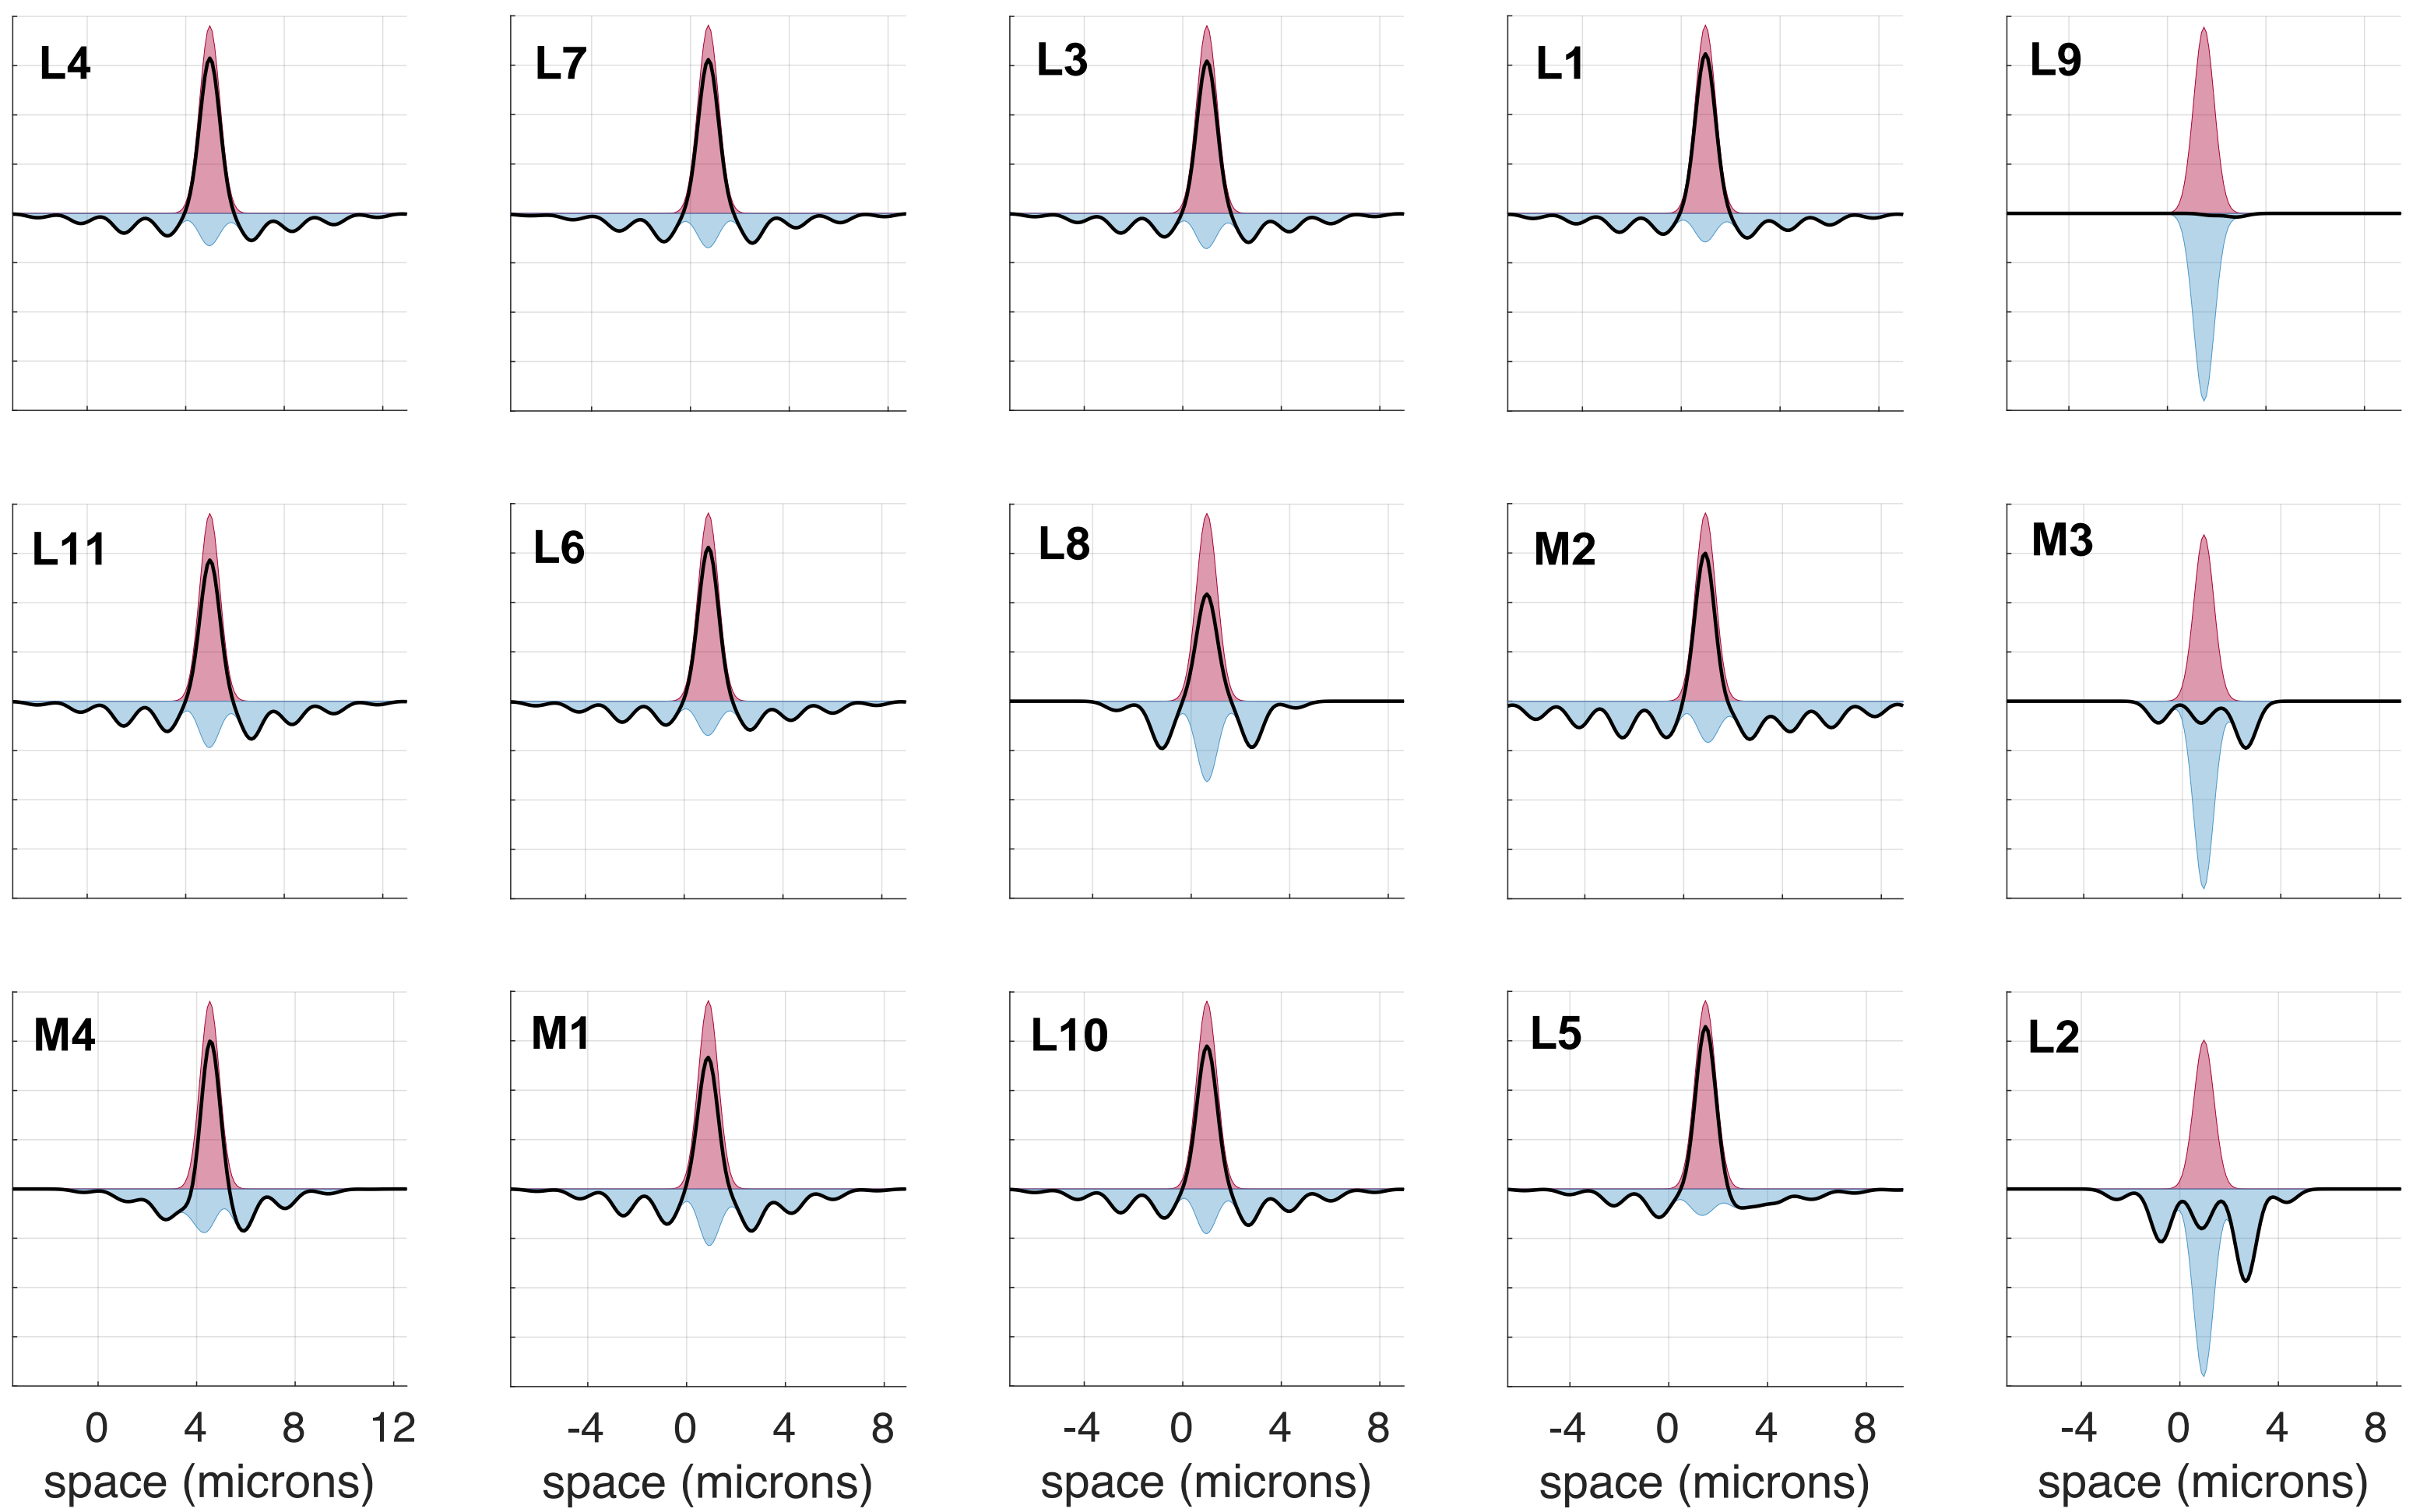

# multi-cone center, 0.00D residual defocus

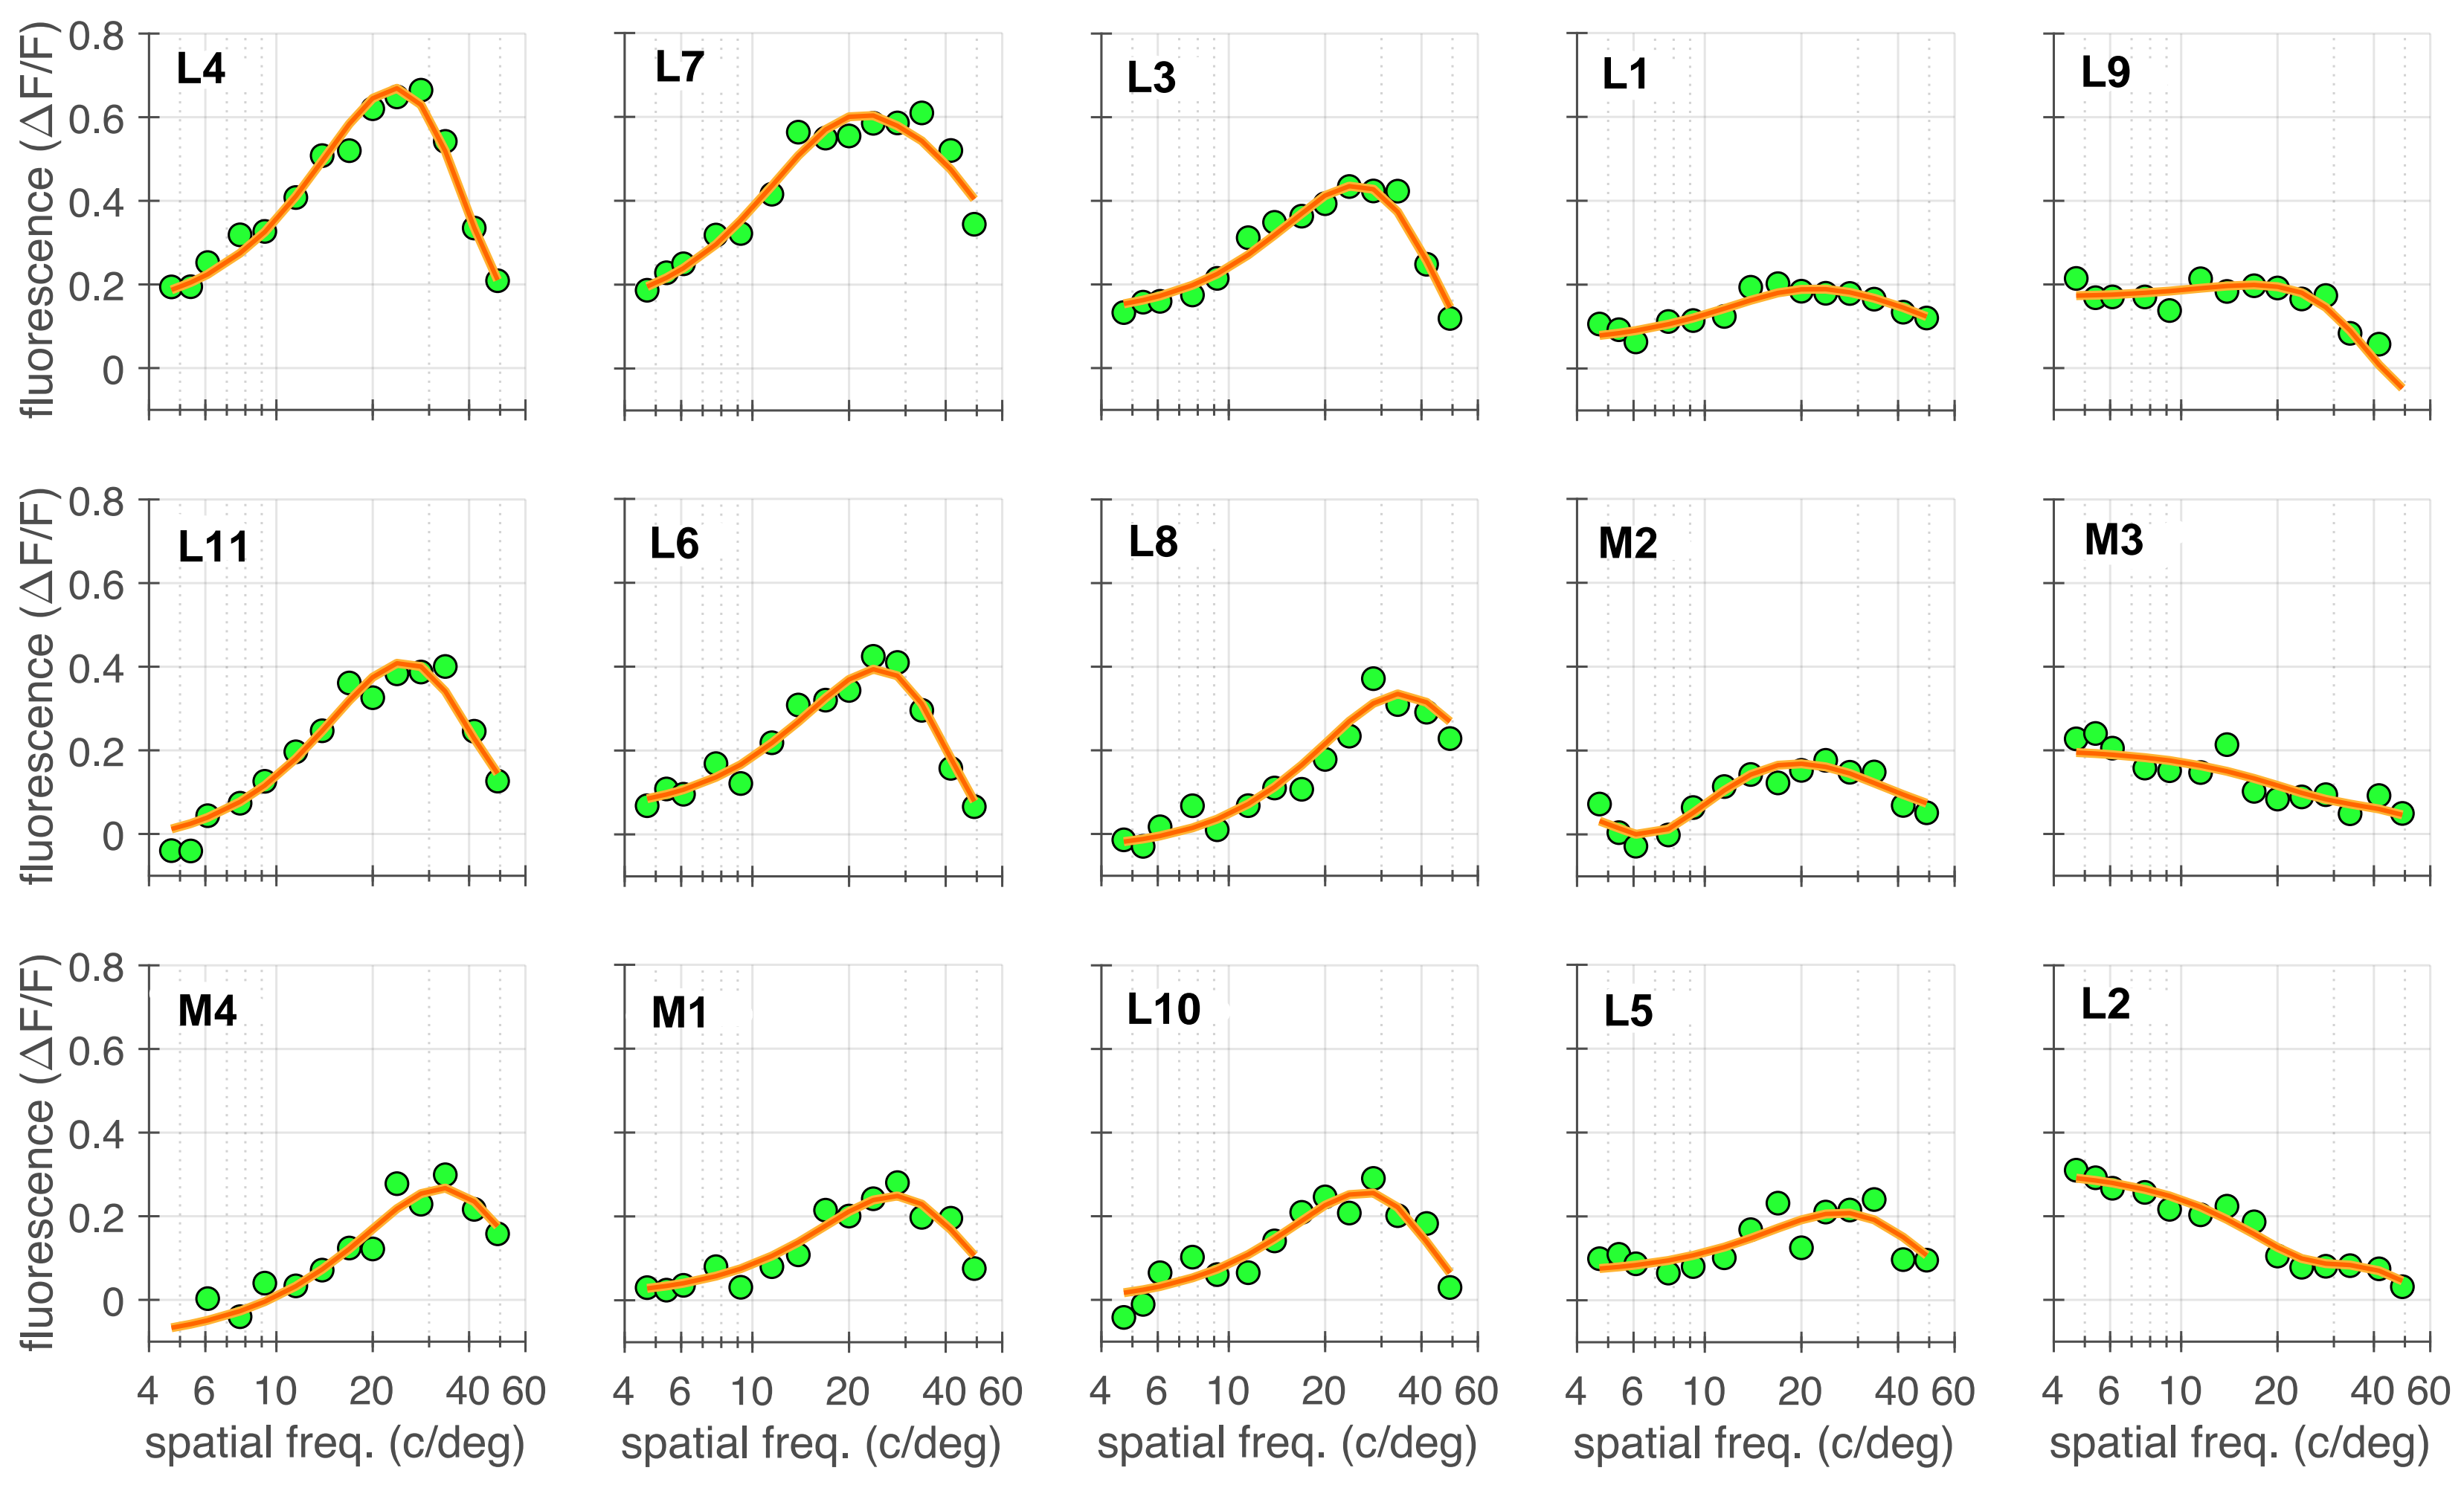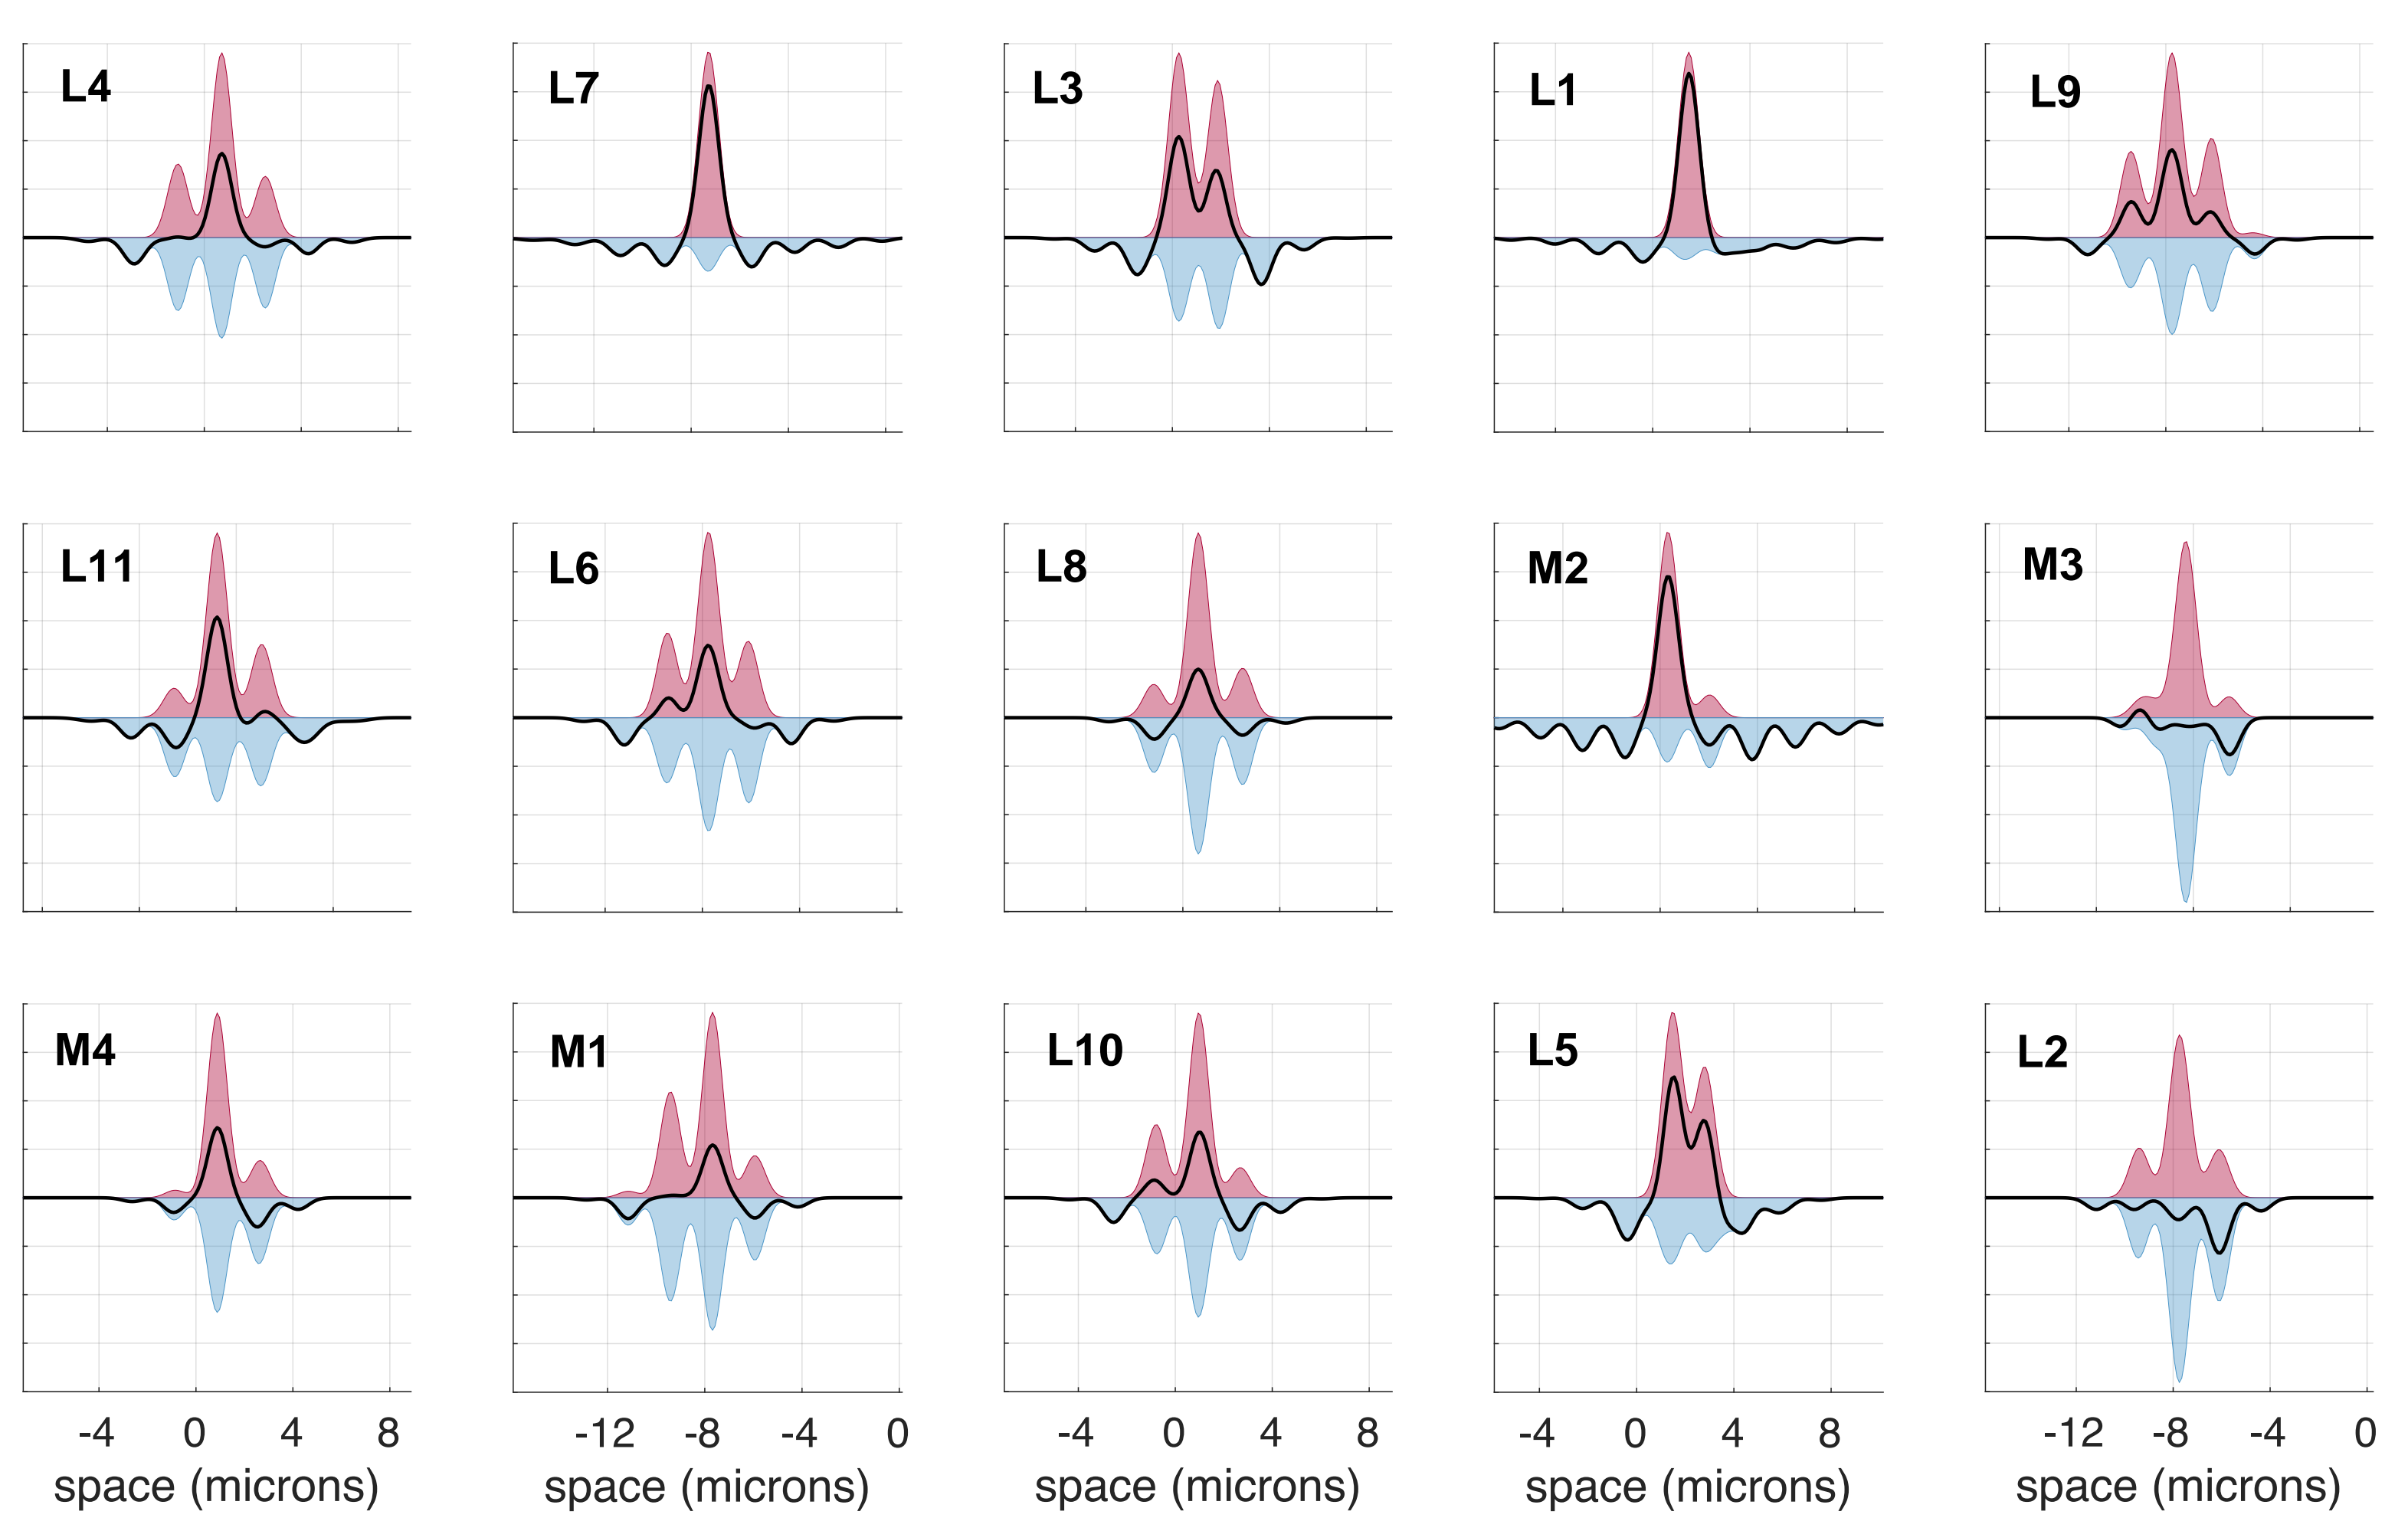

# single-cone center, 0.067D residual defocus

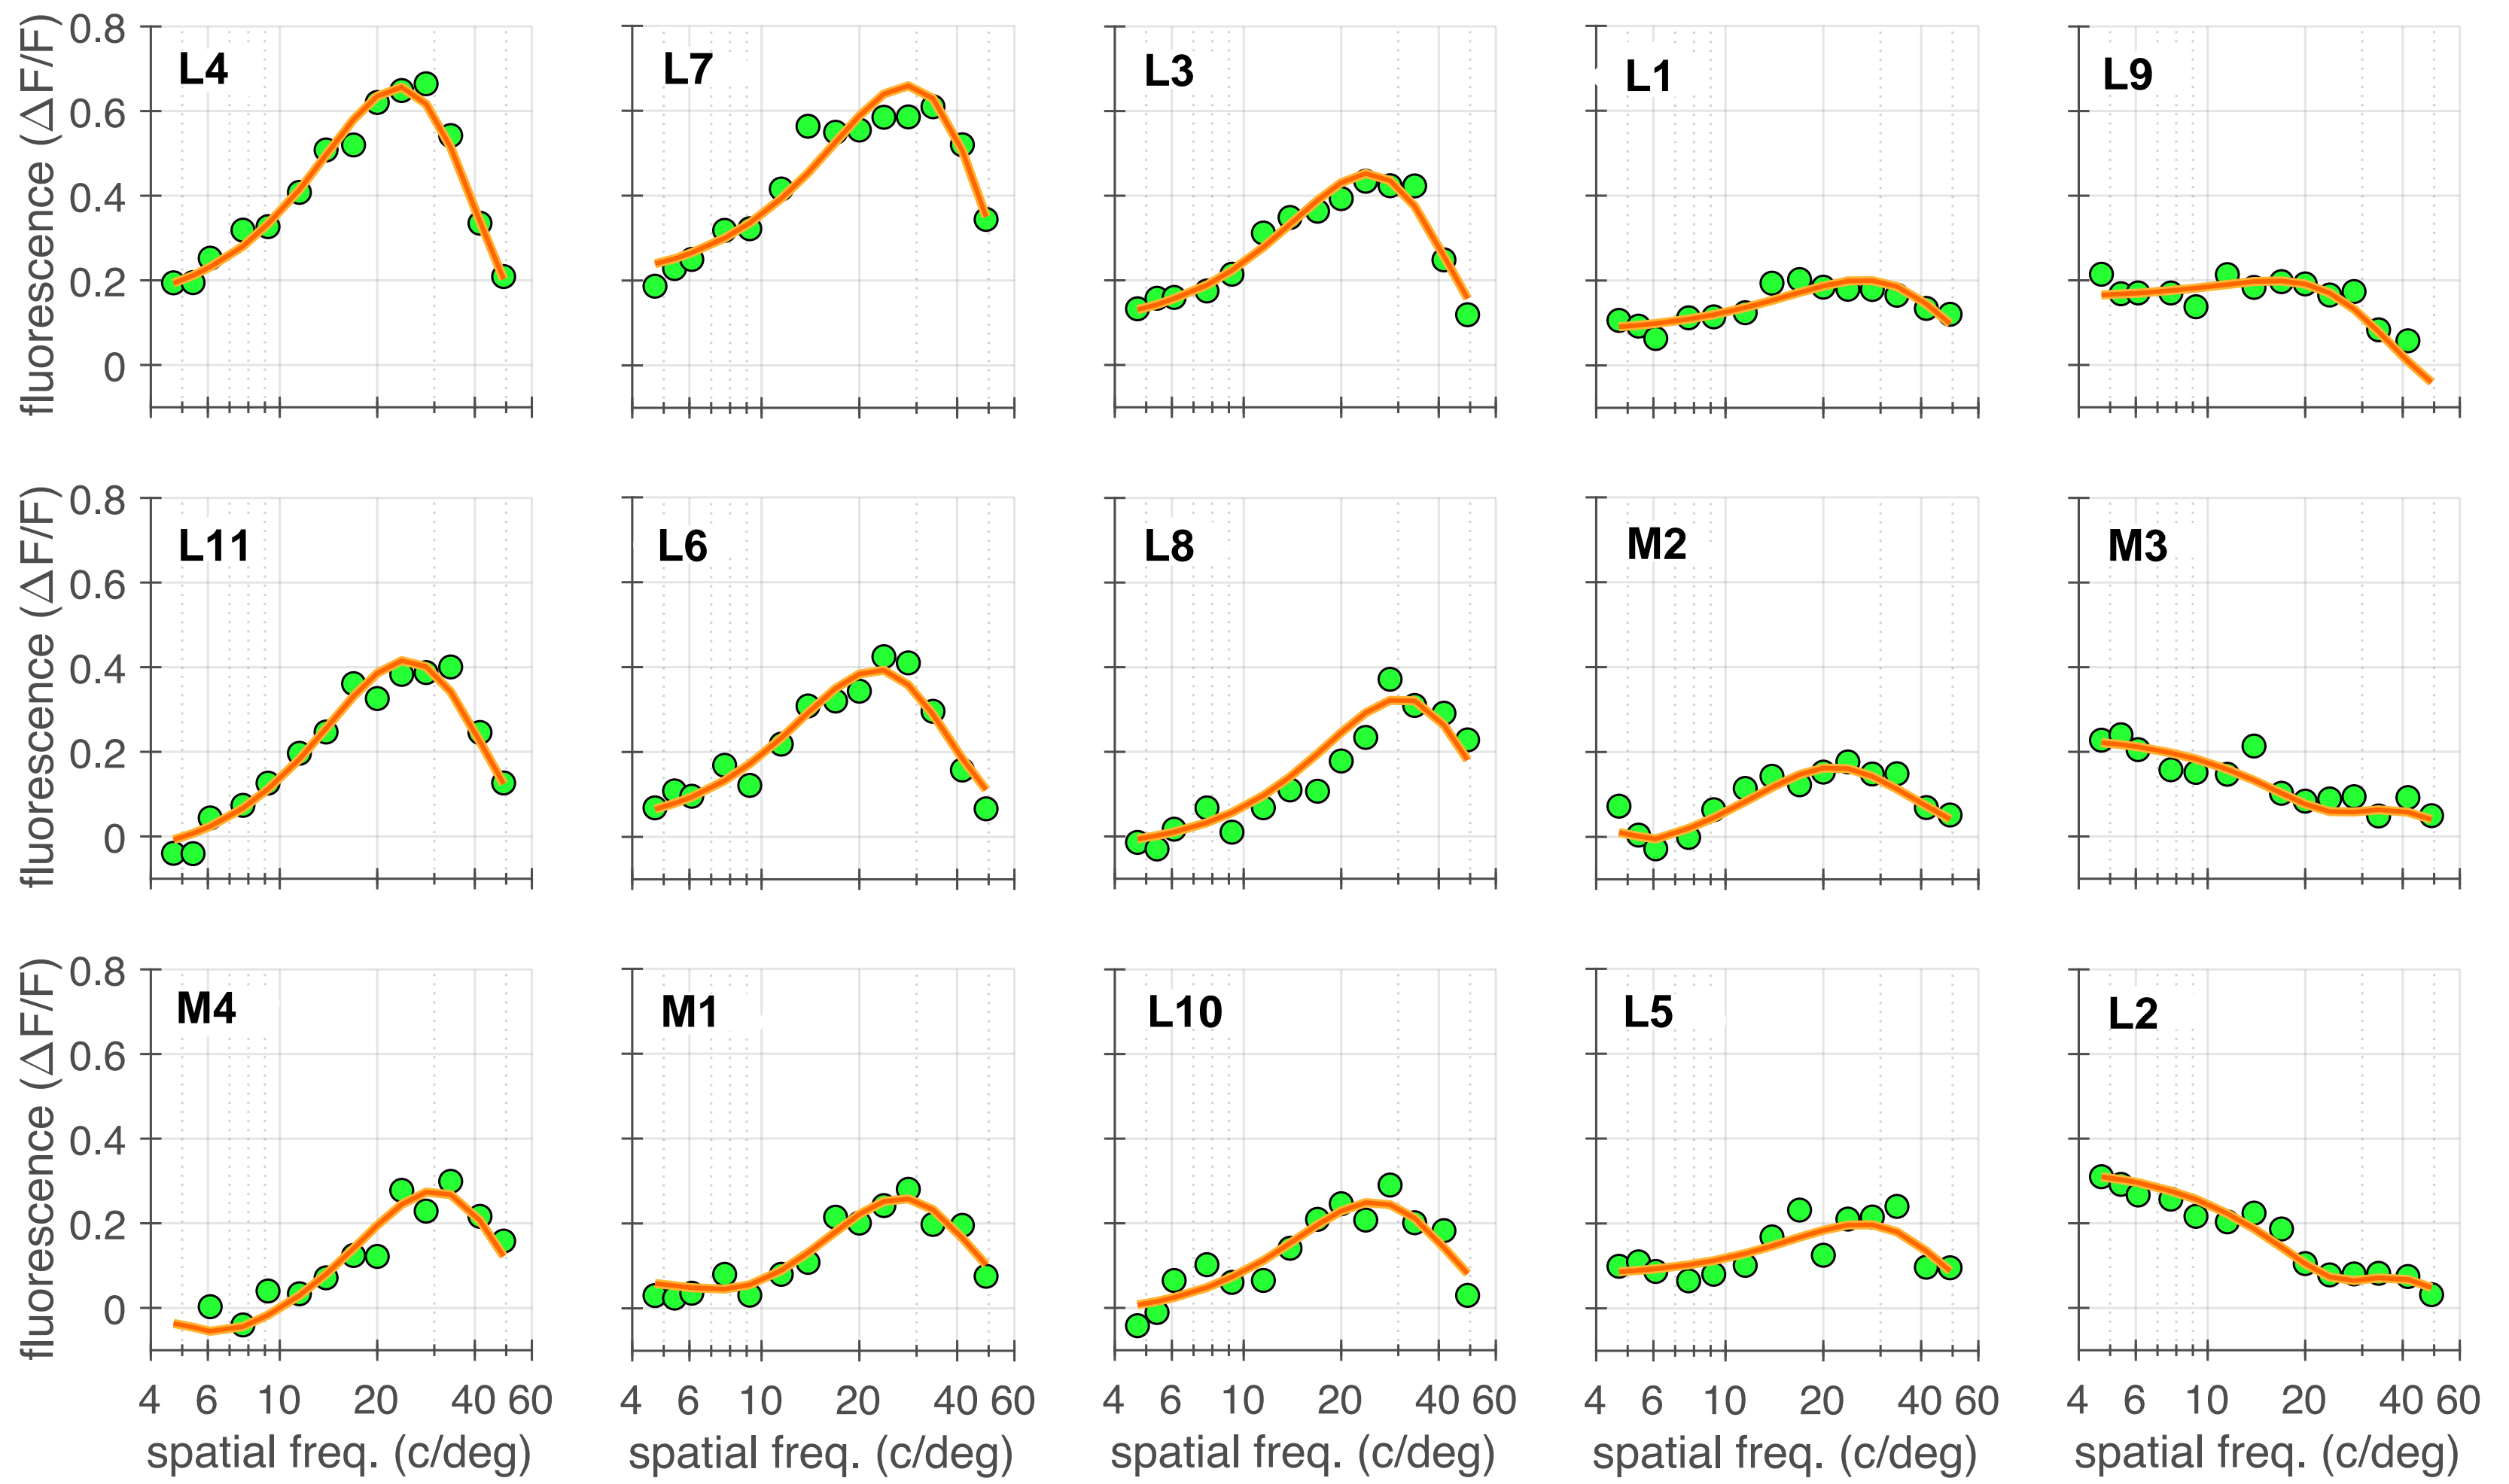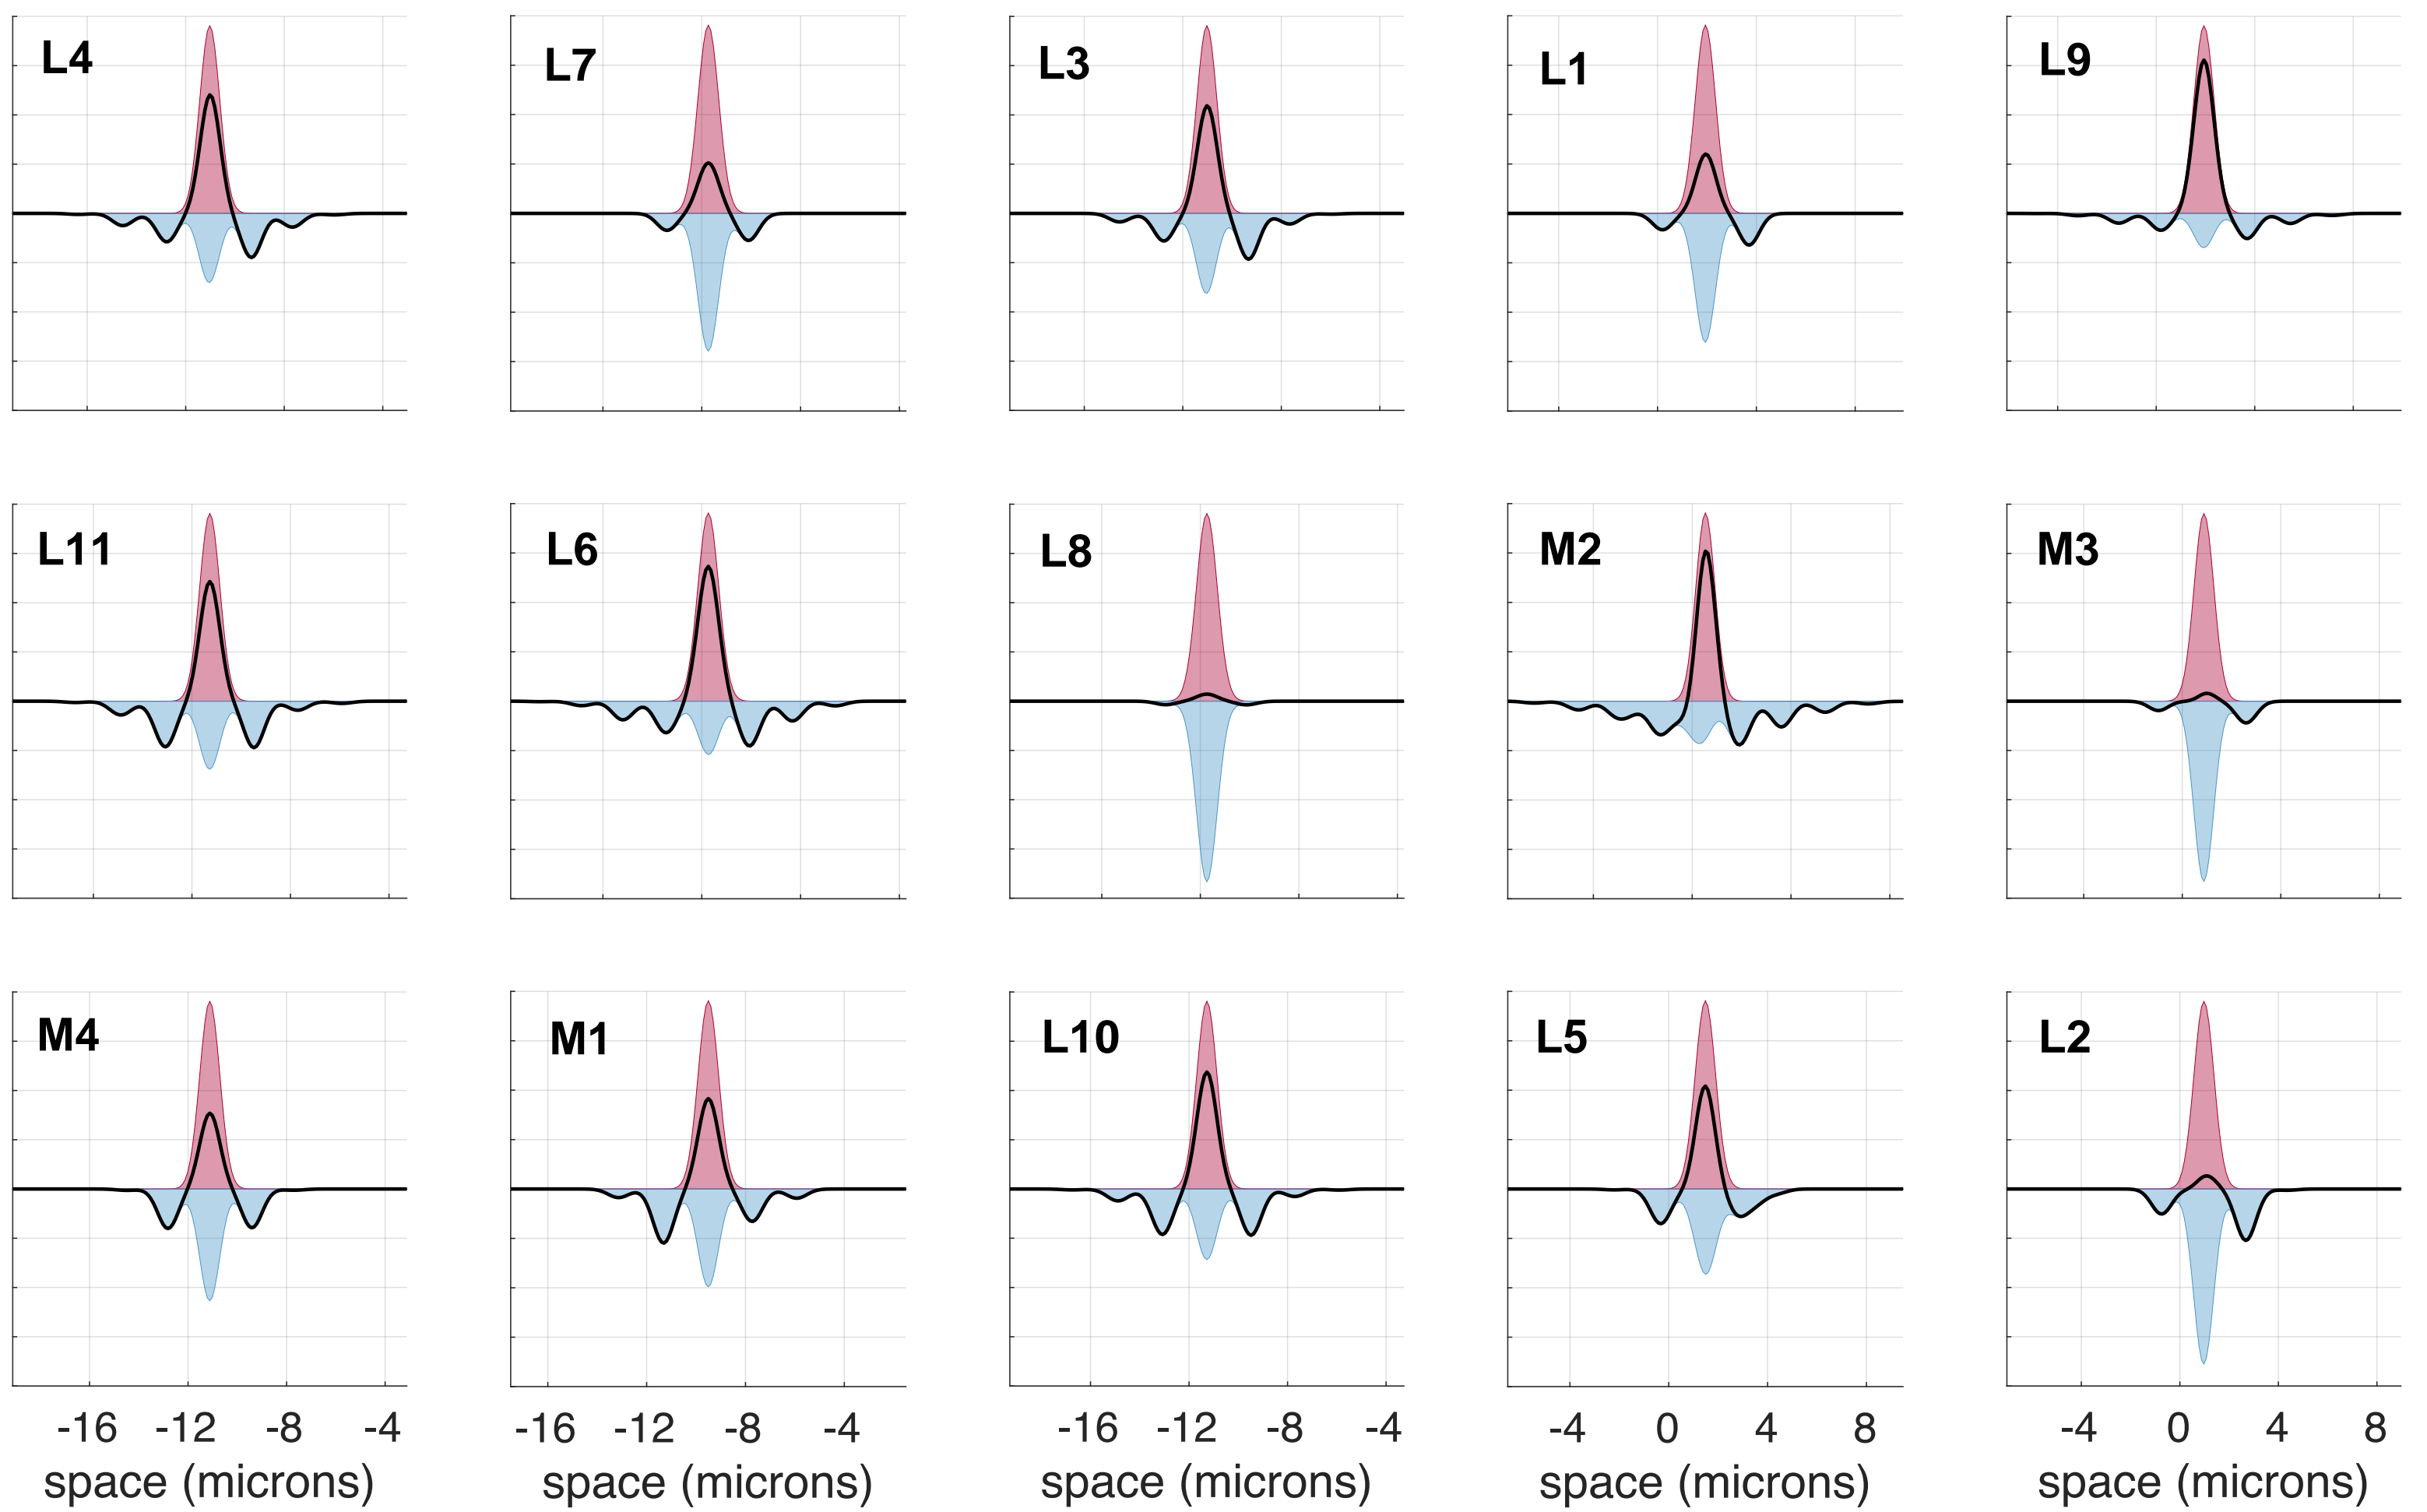

# multi-cone center, 0.067D residual defocus

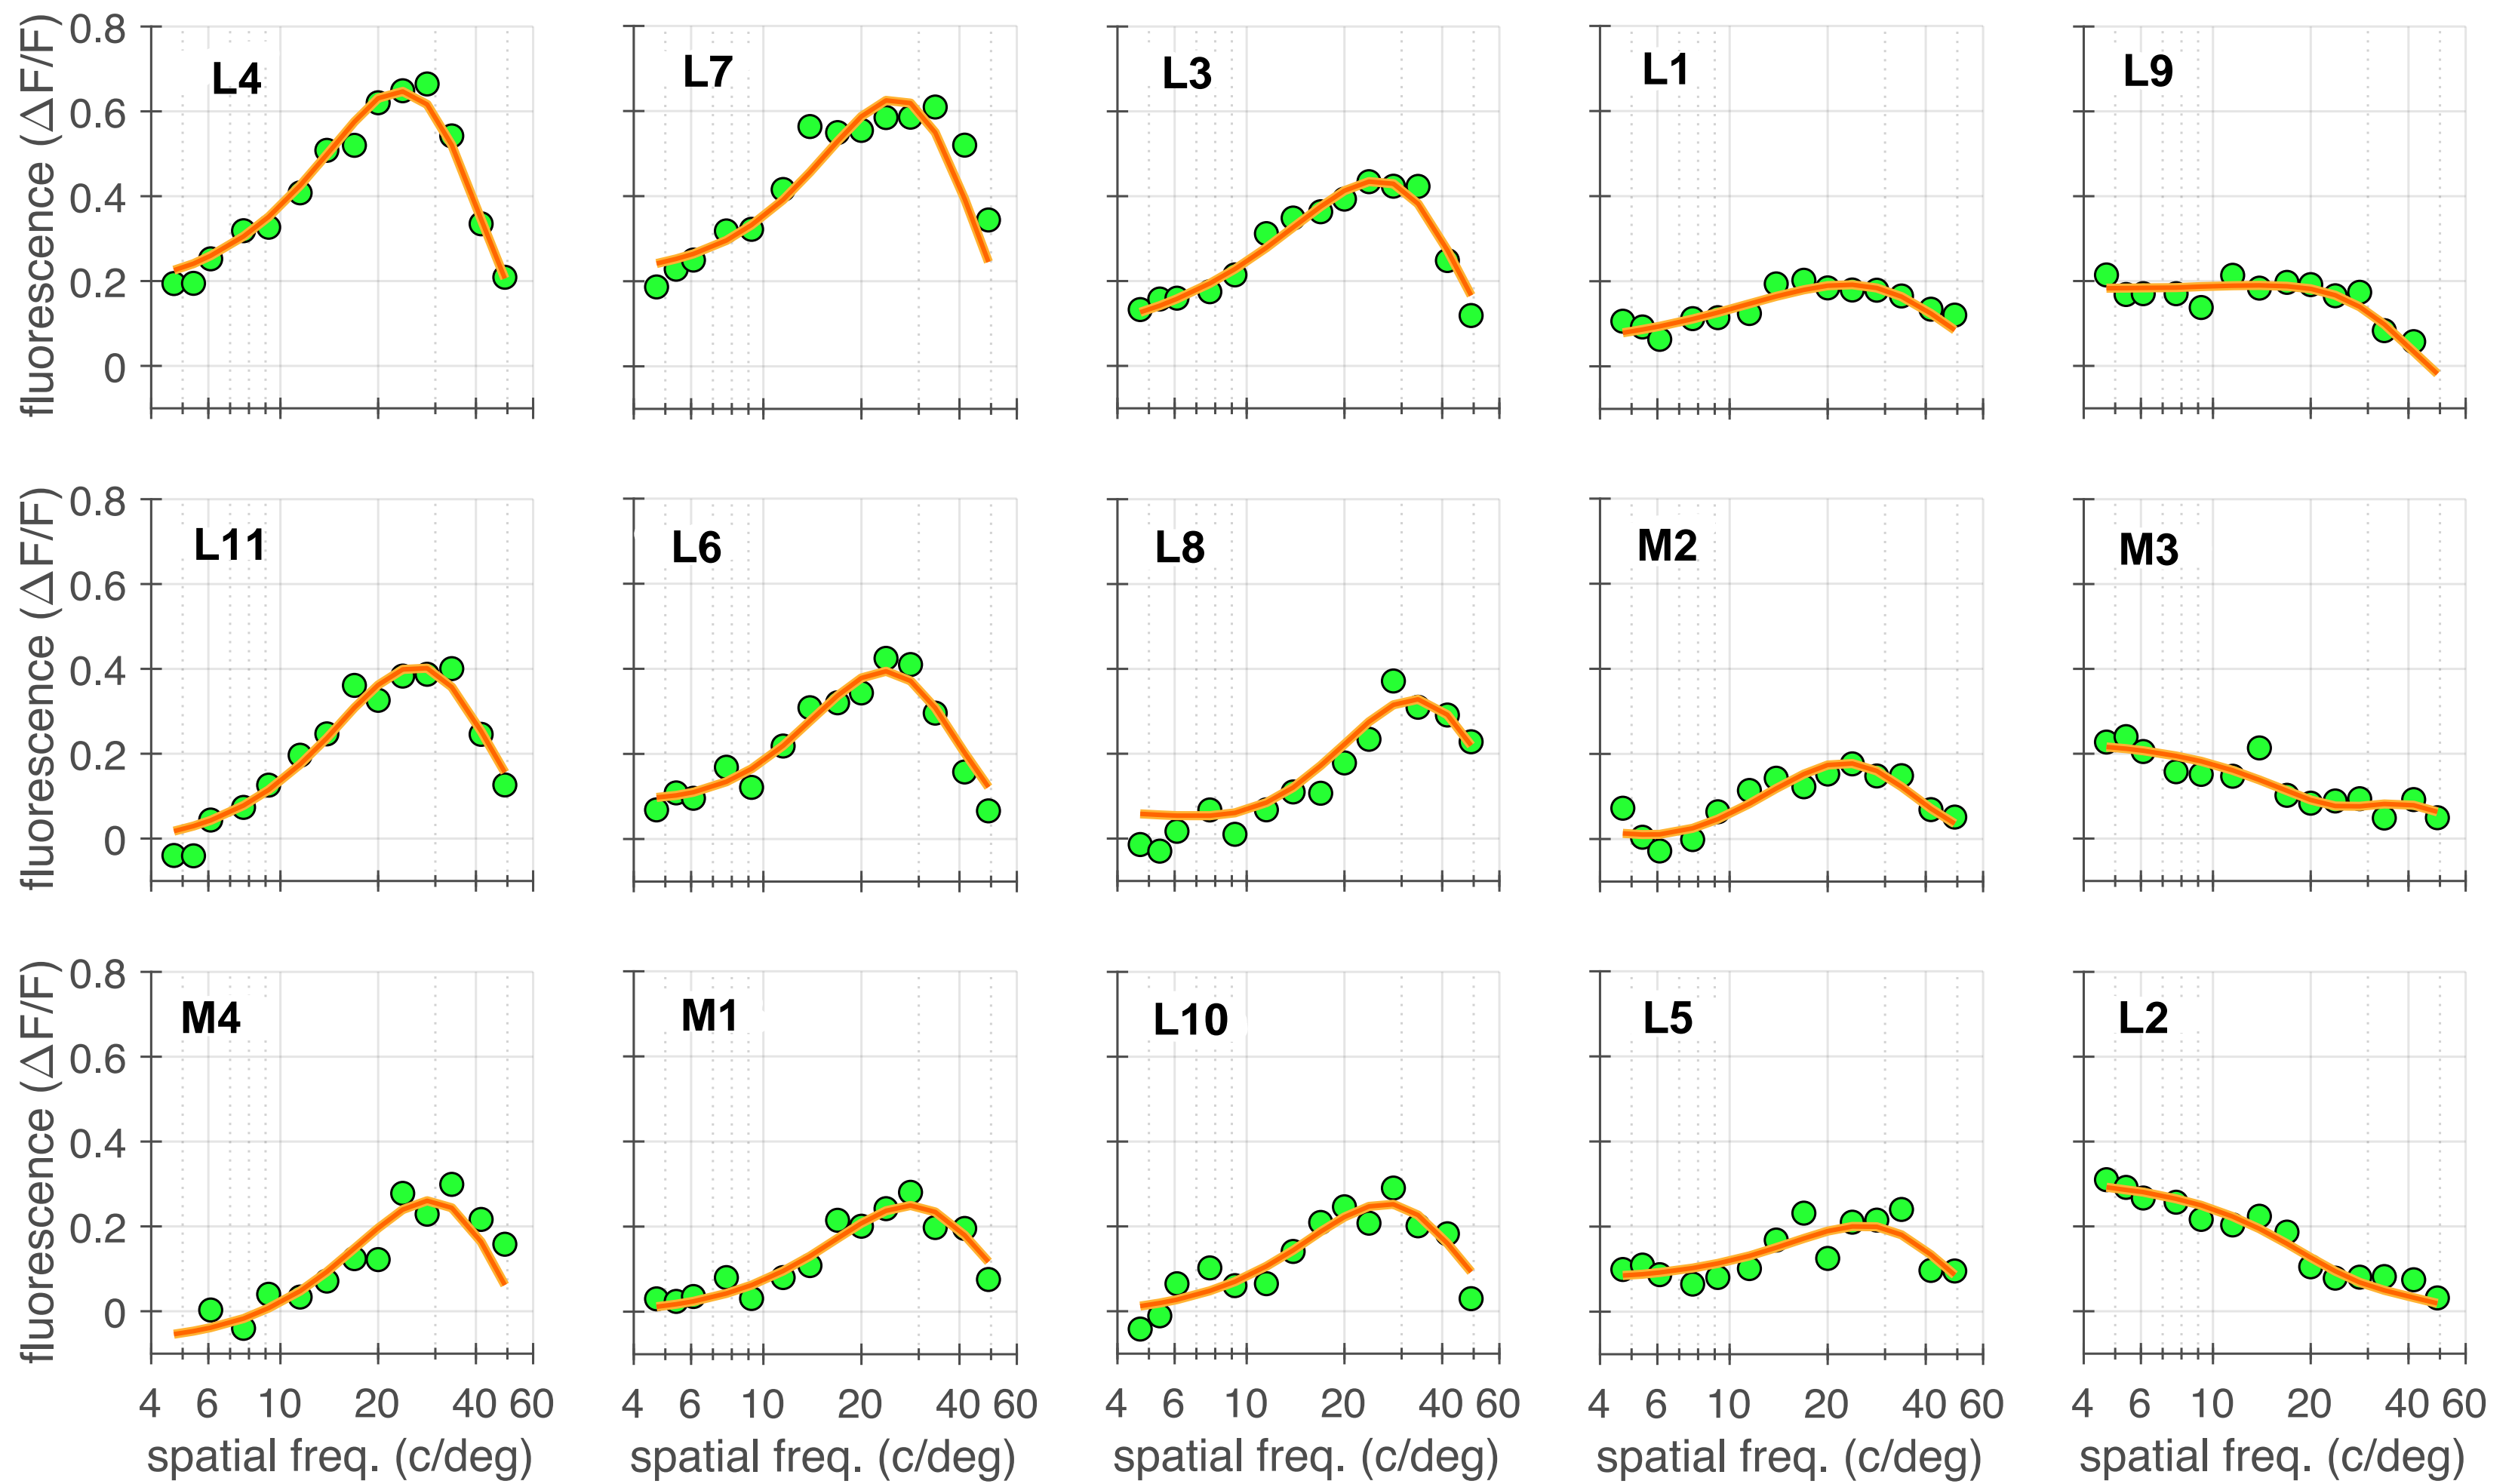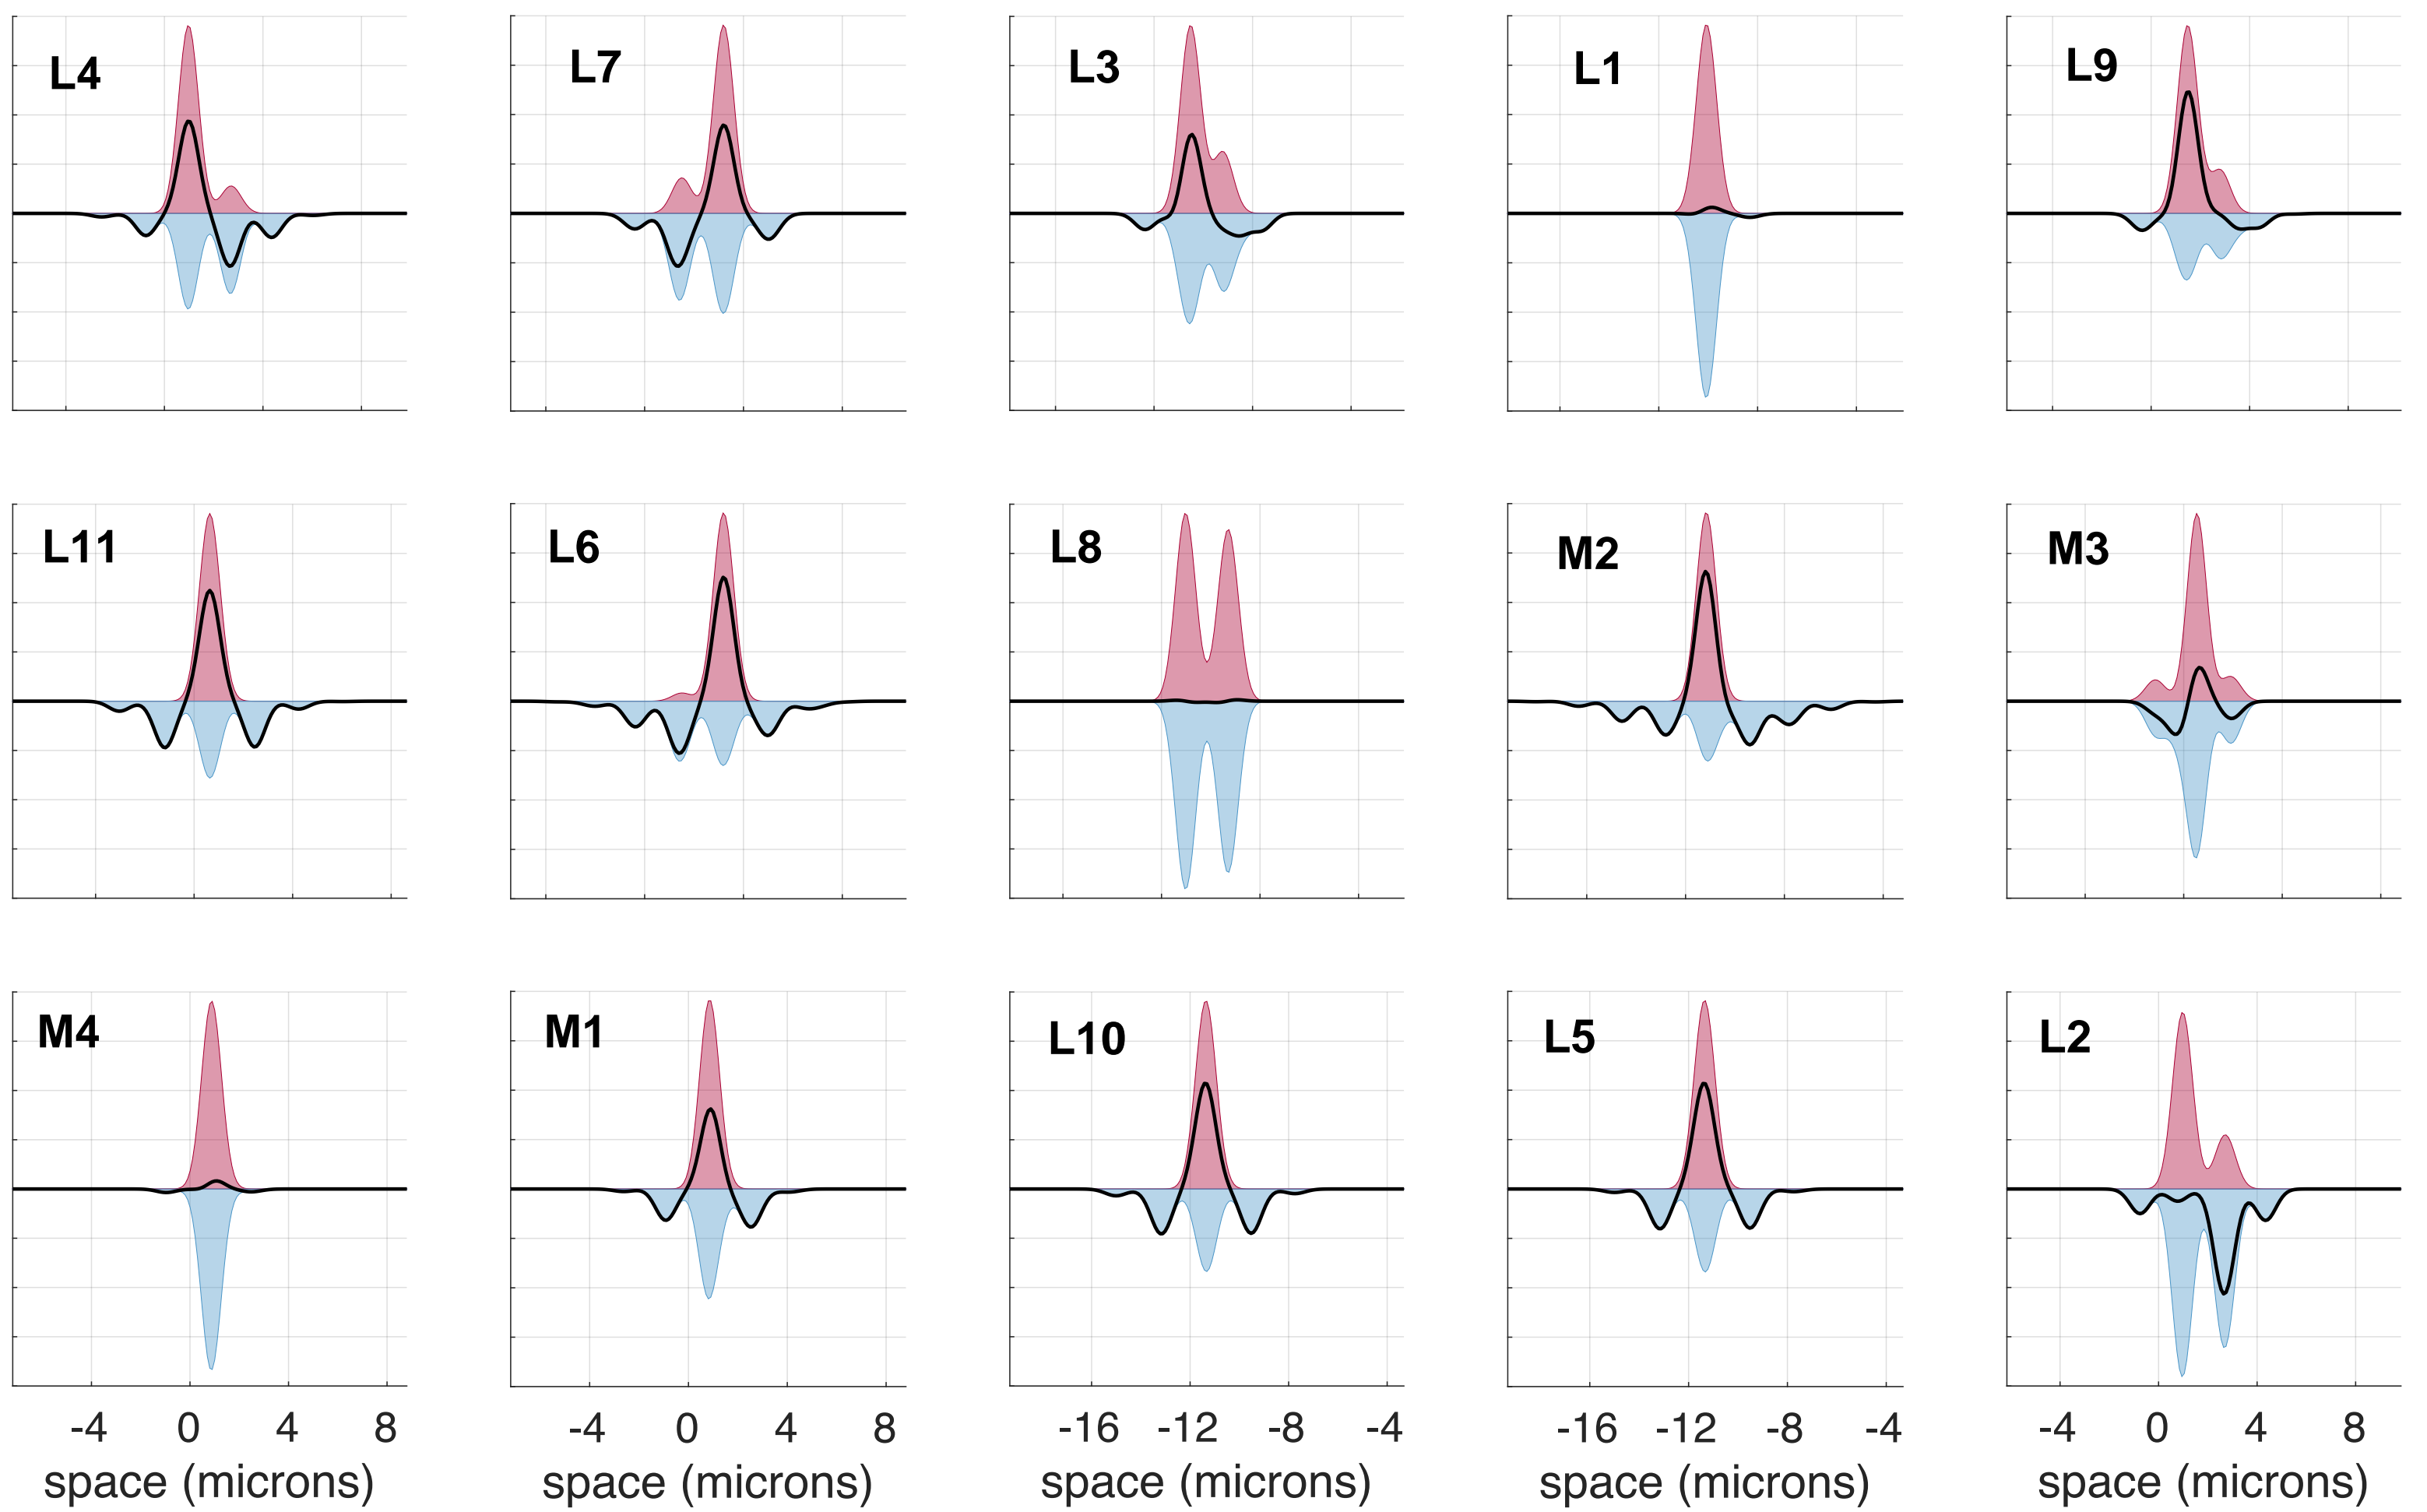

Supplement: pone.0278261.s010.pdf [file pone.0278261.s010.pdf]
